# Supplementary material for: Facile fabrication of large-grain CH3NH3PbI3−xBrx films for high-efficiency solar cells via CH3NH3Br-selective Ostwald ripening
Source: PubMed Central journal article supplement (PMC4974626; doi:10.1038/ncomms12305), 2016-08-01
Supplement: ncomms12305-s1.pdf [file ncomms12305-s1.pdf]

## Supplementary Information

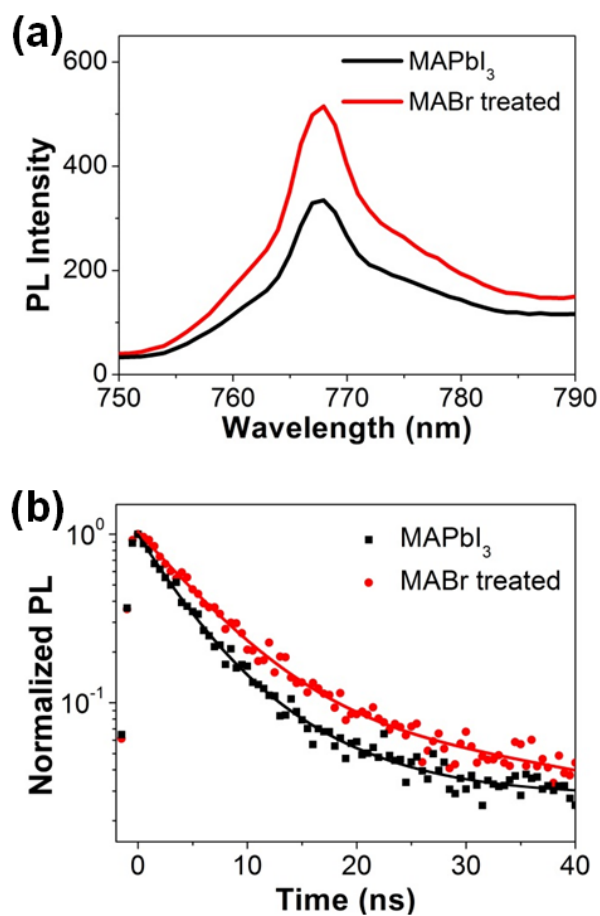

**Supplementary Figure 1. Impact of MABr treatment on the photoluminescence (PL) properties of MAPbI<sub>3</sub> thin film.** (a) Steady-state PL and (b) time-resolved PL spectra of MAPbI<sub>3</sub> films with and without MABr treatment. These transients follow bi-exponential decay. The weighted average of lifetime increases approximately from about 5 ns for MAPbI<sub>3</sub> to 9 ns for MABr-treated perovskite film.

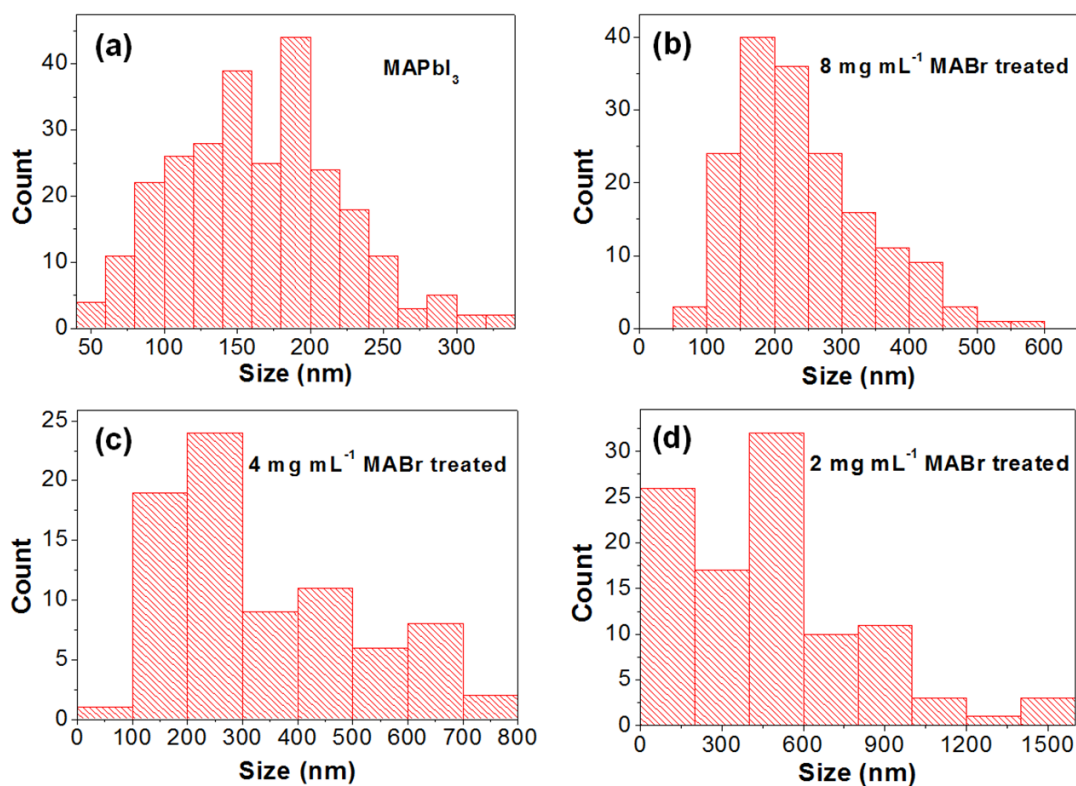

**Supplementary Figure 2. Grain-size distribution.** Perovskite films (a) without and with (b) 8, (c) 4, and (d) 2 mg mL<sup>-1</sup> MABr solution treatment.

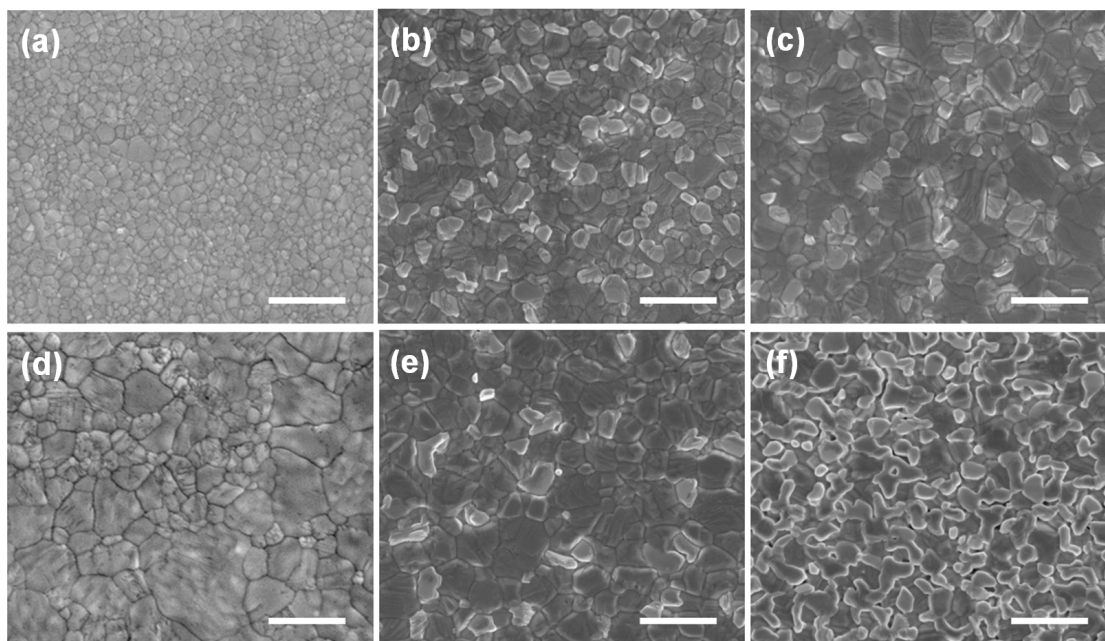

**Supplementary Figure 3. Top-view SEM images of perovskite thin films.** (a) As-prepared MAPbI<sub>3</sub> thin films and those treated with (b) IPA solvent and (c) 1 mg mL<sup>-1</sup> MABr, (d) 2 mg mL<sup>-1</sup> MABr, (e) 2.8 mg mL<sup>-1</sup> MAI, and (f) 1.2 mg mL<sup>-1</sup> MAI solutions, respectively. Scale bars, 1 μm.

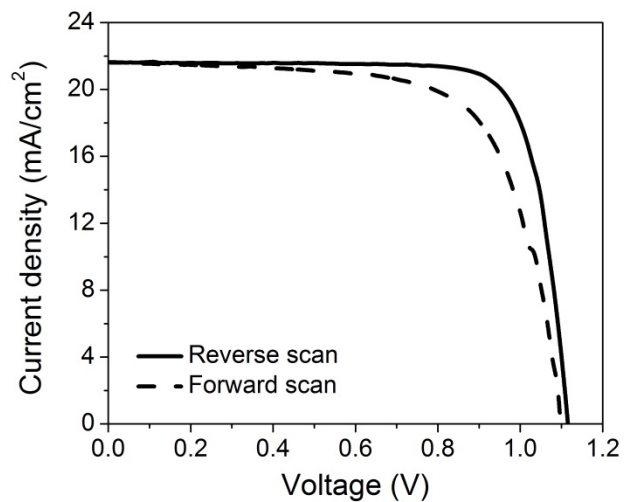

**Supplementary Figure 4. Current density-voltage ( $J-V$ ) curves with both forward and reverse scans for the “champion” cell.** For the reverse scan, the device shows a power conversion efficiency ( $PCE$ ) of 19.12%, with short-circuit current density ( $J_{sc}$ ) of 21.60 mA/cm<sup>2</sup>, open-circuit voltage ( $V_{oc}$ ) of 1.12 V, and fill factor ( $FF$ ) of 0.793. For the forward scan, the device shows a  $PCE$  of 16.43%, with  $J_{sc}$  of 21.61 mA/cm<sup>2</sup>,  $V_{oc}$  of 1.097 V, and  $FF$  of 0.693.

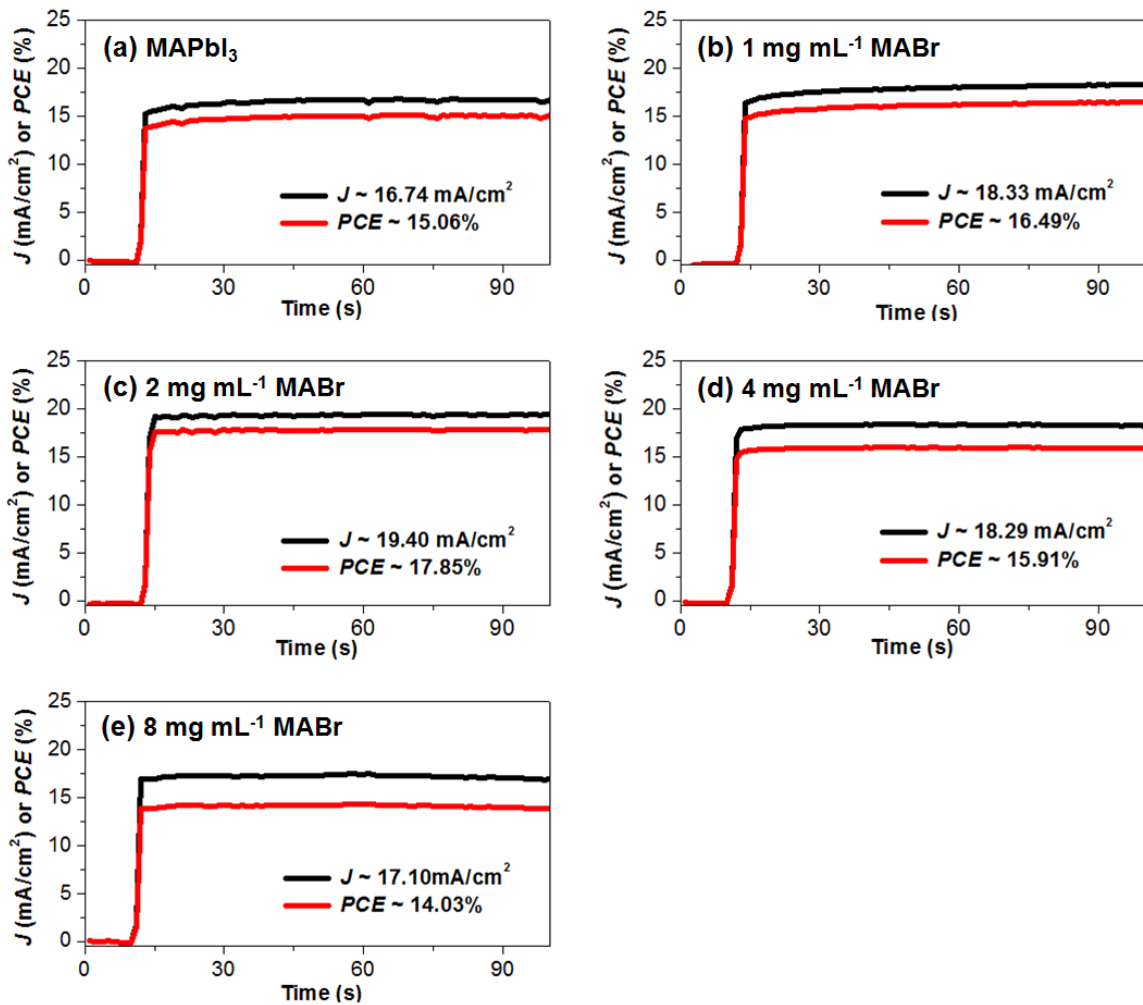

**Supplementary Figure 5. MABr concentration effect on the stabilized photocurrent density and power conversion efficiency biased near the maximum power point. Perovskite thin films are (a) MAPbI<sub>3</sub> and those treated with (b) 1, (c) 2, (d) 4, and (e) 8 mg mL<sup>-1</sup> MABr solutions.**

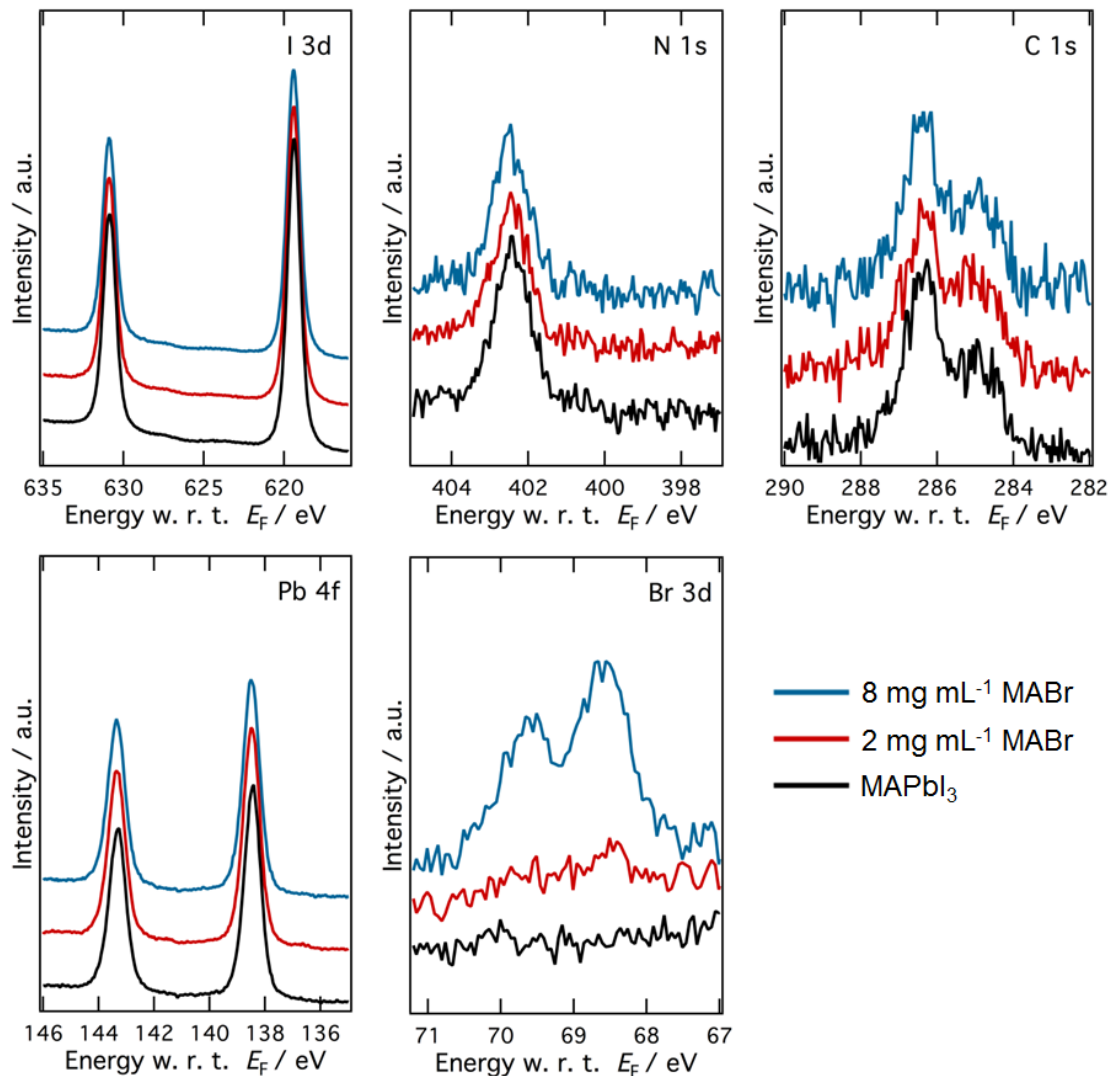

**Supplementary Figure 6. X-ray photoelectron spectroscopy (XPS) core-level spectra.** Plots of XPS spectra of I 3d, N 1s, C 1s, Pb 4f, and Br 3d levels for MAPbI<sub>3</sub> thin films and those treated with low (2 mg mL<sup>-1</sup>) and high (8 mg mL<sup>-1</sup>) concentration MABr solutions. Despite an increase in the bromine content with increased concentration of the MABr solution, no further changes is observed in film stoichiometry upon MABr post-treatment. Moreover, the absence of core-level shifts indicates that no significant change in the Fermi level position occurs with Ostwald ripening.

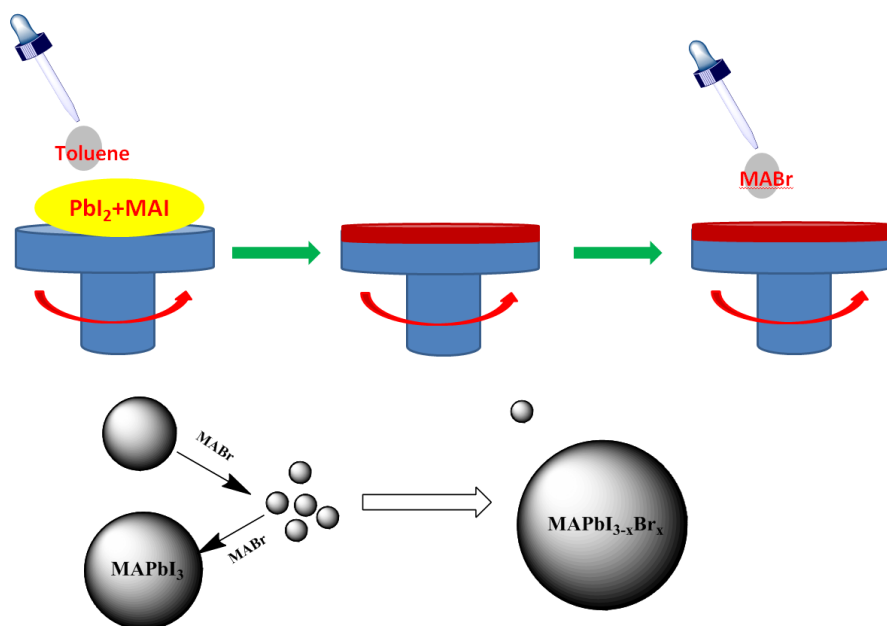

**Supplementary Figure 7. Schematic illustration.** Procedure and mechanism for the MABr selective Ostwald ripening process for the perovskite crystal growth.

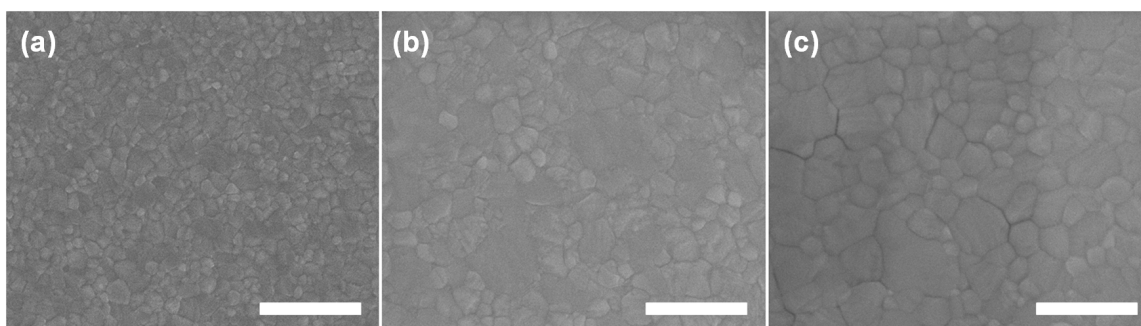

**Supplementary Figure 8. Top-view SEM images of perovskite thin films. (a)** As-prepared MAPbI<sub>3</sub> and those treated with 2 mg mL<sup>-1</sup> MABr solution **(b)** before and **(c)** after annealing treatment. Scale bars, 1 μm.



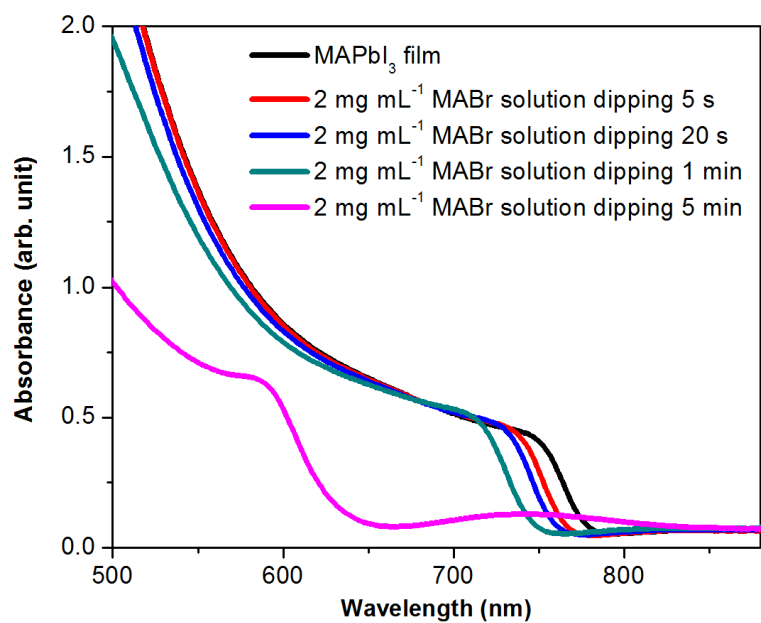

**Supplementary Figure 9. Ultraviolet-visible absorption spectra.** Perovskite thin films were subjected to dipping treatment in 2 mg mL<sup>-1</sup> MABr solution for various durations.

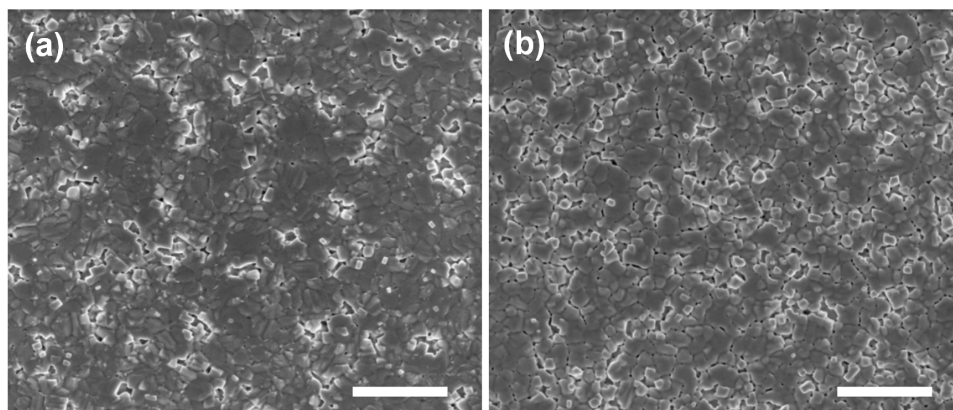

**Supplementary Figure 10. Top-view scanning electron microscopy images of perovskite thin films.** MAPbI<sub>3</sub> thin films were dipped in 2 mg mL<sup>-1</sup> MABr solution for (a) 20 s and (b) 5 min. Scale bars, 1 μm.

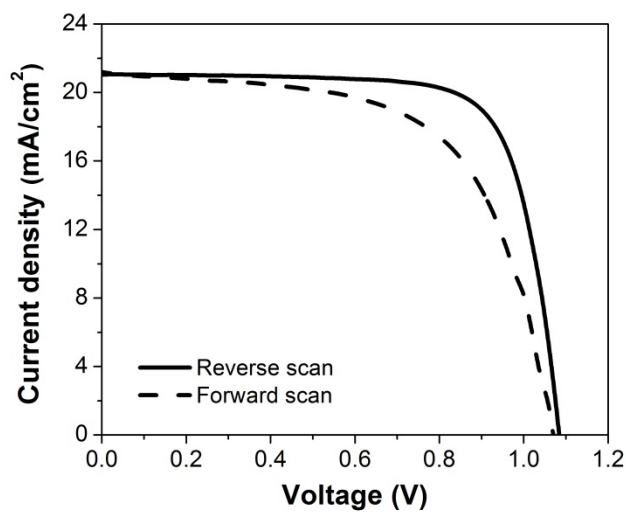

**Supplementary Figure 11. J–V curves with both forward and reverse scans for the “champion” cell with MAI treatment.** For the reverse scan, the device shows a *PCE* of 17.11%, with  $J_{sc}$  of 21.05 mA/cm<sup>2</sup>,  $V_{oc}$  of 1.084 V, and *FF* of 0.749. For the forward scan, the device shows a *PCE* of 13.93%, with  $J_{sc}$  of 21.18 mA/cm<sup>2</sup>,  $V_{oc}$  of 1.071 V, and *FF* of 0.614.

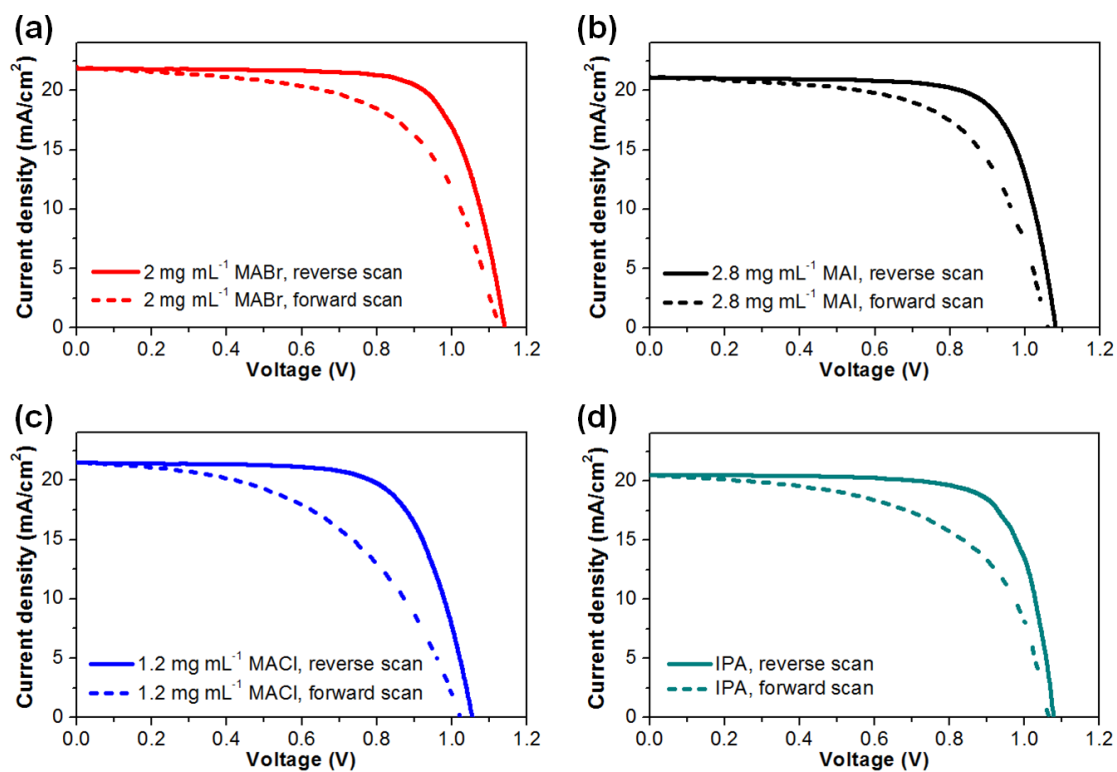

**Supplementary Figure 12.  $J$ - $V$  curves with both forward and reverse scans for PSCs with various treatments.** The perovskite films were treated with (a)  $2 \text{ mg mL}^{-1}$  MABr, (b)  $2.8 \text{ mg mL}^{-1}$  MAI, (c)  $1.2 \text{ mg mL}^{-1}$  MACl solutions, and (d) IPA solvent, respectively.

**Supplementary Table 1. Photovoltaic parameters for perovskite solar cells with various treatments.** Standard deviations from 8–12 cells for each type of devices are given.

| <b>Treatment solution</b>       | <b><math>J_{sc}</math><br/>(mA cm<sup>-2</sup>)</b> | <b><math>V_{oc}</math><br/>(V)</b> | <b><math>FF</math><br/>(%)</b> | <b><math>PCE</math><br/>(%)</b> |
|---------------------------------|-----------------------------------------------------|------------------------------------|--------------------------------|---------------------------------|
| 2 mg mL <sup>-1</sup><br>MABr   | 21.86 ± 0.12                                        | 1.120 ± 0.010                      | 0.754 ± 0.020                  | 18.50 ± 0.39                    |
| 2.8 mg mL <sup>-1</sup><br>MAI  | 21.35 ± 0.19                                        | 1.071 ± 0.006                      | 0.748 ± 0.006                  | 17.11 ± 0.21                    |
| 1.2 mg mL <sup>-1</sup><br>MAcI | 21.52 ± 0.14                                        | 1.061 ± 0.009                      | 0.696 ± 0.017                  | 15.89 ± 0.41                    |
| IPA                             | 20.62 ± 0.43                                        | 1.067 ± 0.009                      | 0.728 ± 0.031                  | 16.03 ± 1.08                    |
